# Supplementary material
Source: publisher figshare collection journal article supplement (https://gsajournals.figshare.com/articles/dataset/_/7674281)
Supplement: Supplementary file 1 [file 1]

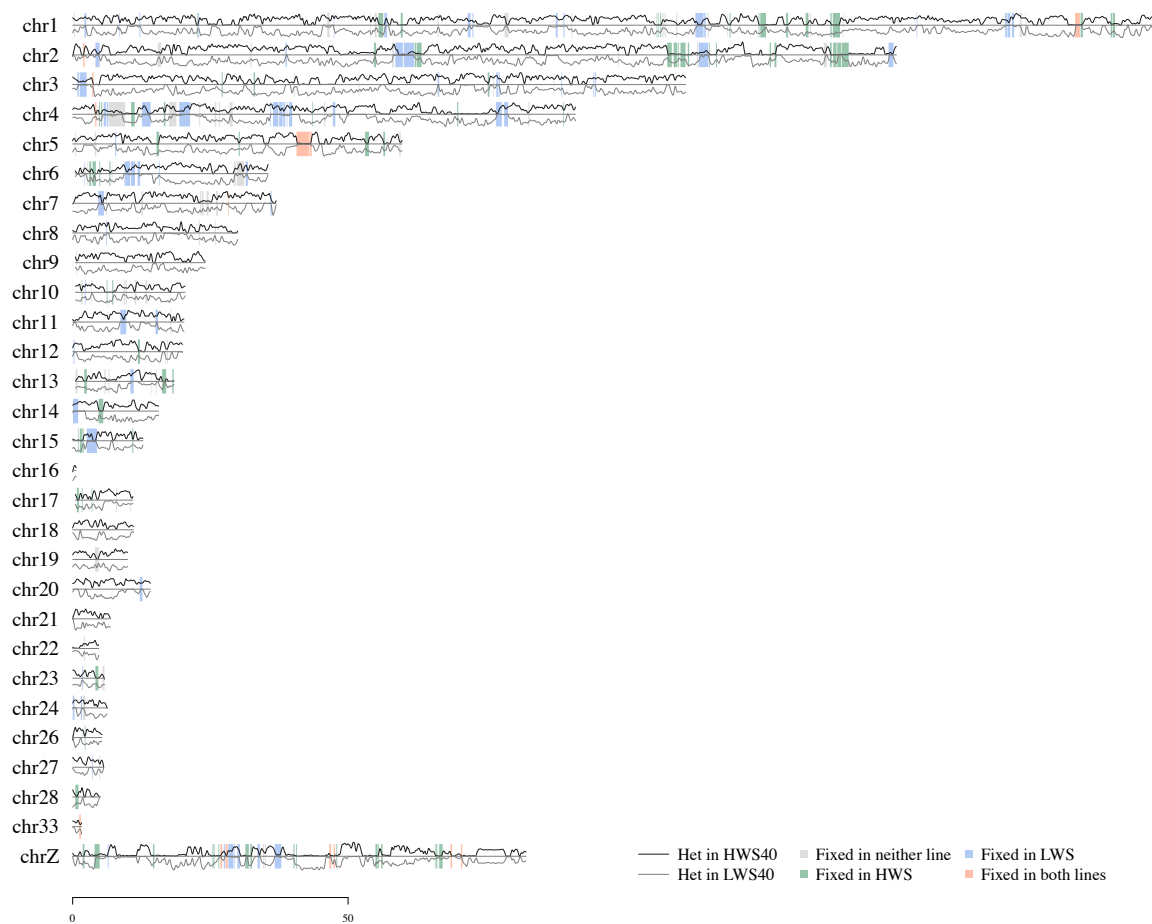

Figure S1. Heterozygosity across chromosomes at generation 40 in the divergently selected Virginia body weight chicken lines.

A. Heterozygosity of HWS (black line above axis) and LWS (grey line above axis) presented across the chicken chromosomes with differentiated regions shaded using color code: grey where neither line is fixed within the differentiated region; green where only HWS is fixed within the differentiated region; blue where only LWS is fixed within the differentiated region; red where both lines are fixed within the differentiated region.
