# Supplementary material
Source: publisher figshare collection journal article supplement (https://gsajournals.figshare.com/articles/dataset/_/7674281)
Supplement: Supplementary file 2 [file 1]

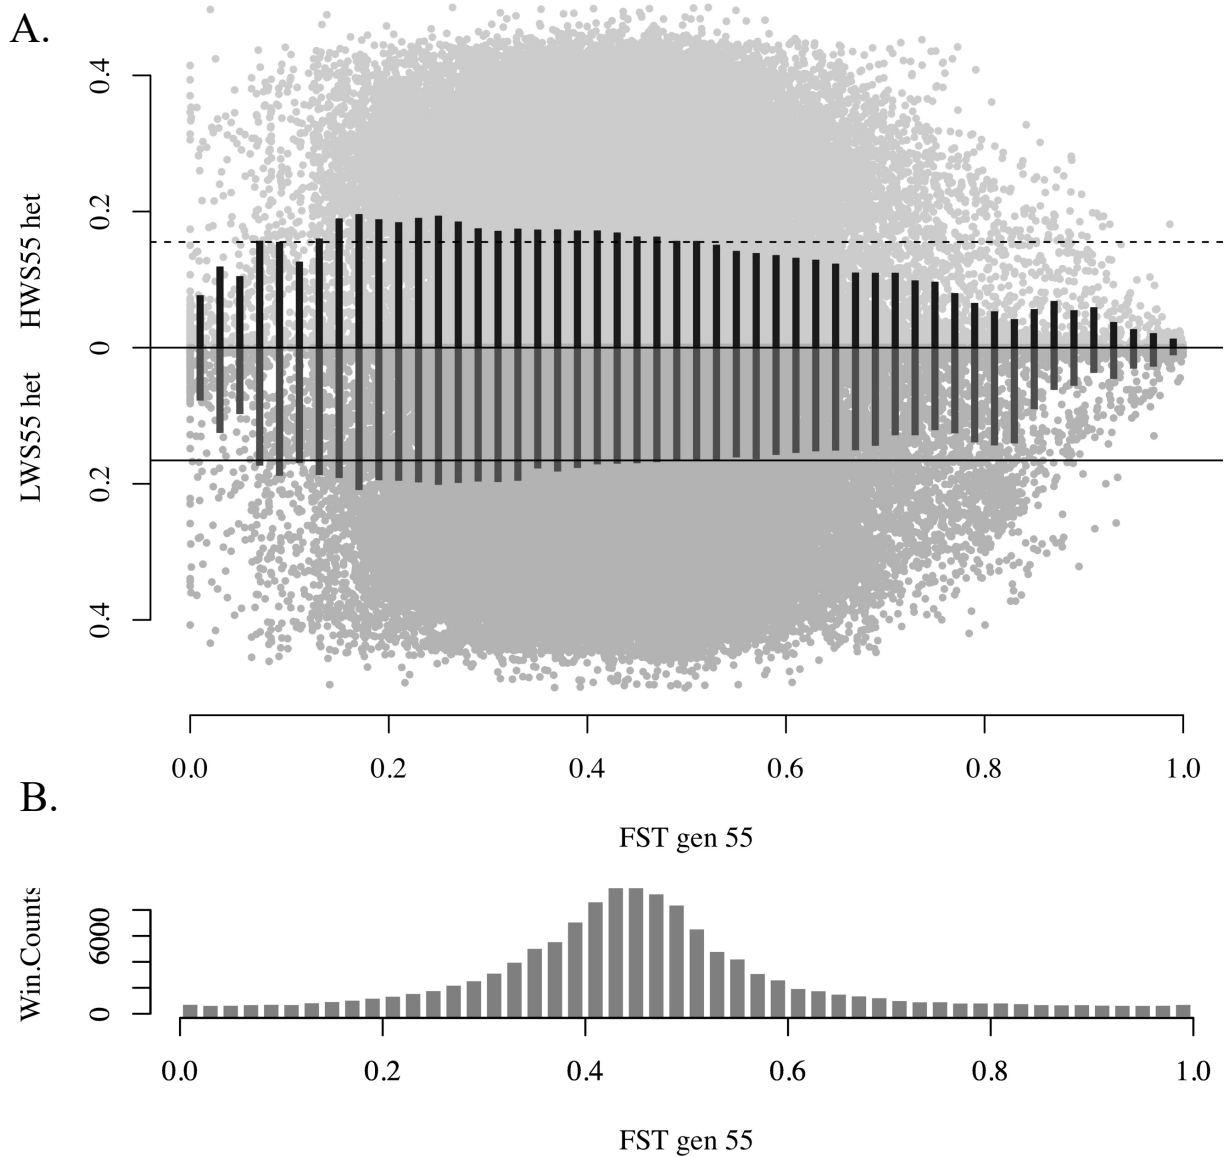

Figure S2. A. Genome-wide heterozygosity in high weight selected generation 55 (HWS55; above the x-axis) and low weight selected generation 55 (LWS55; below the x-axis) across differentiation ( $F_{ST}$ ) between HWS55 and LWS55 shown by points. Heterozygosity within lines and  $F_{ST}$  between lines were averaged across 10 kb windows. Segments represent mean heterozygosity in HWS55 (above the x-axis) and LWS55 (below the x-axis) within windows of 0.02  $F_{ST}$ .

B. Counts of 10 kb genomic windows for each window of 0.02  $F_{ST}$ .
