# Supplementary material
Source: publisher figshare collection journal article supplement (https://gsajournals.figshare.com/articles/dataset/_/7674281)
Supplement: Supplementary file 3 [file 1]

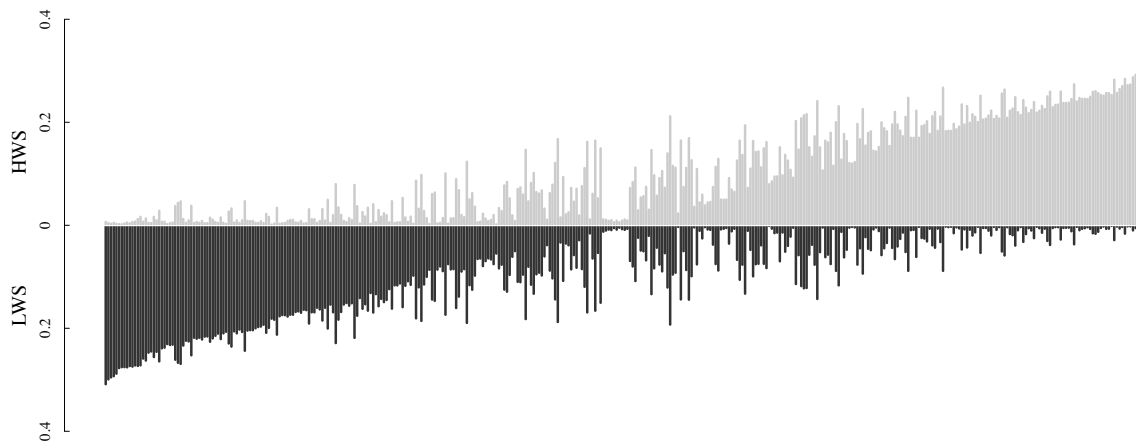

Figure S3. Comparisons of mean heterozygosity remaining in HWS (above axis; grey) and LWS (below axis; black) at generation S55 within all differentiated regions.
