# Supplementary material
Source: publisher figshare collection journal article supplement (https://gsajournals.figshare.com/articles/dataset/_/7674281)
Supplement: Supplementary file 4 [file 1]

Chromosome 1: 169,399,340-169,399,510 bp

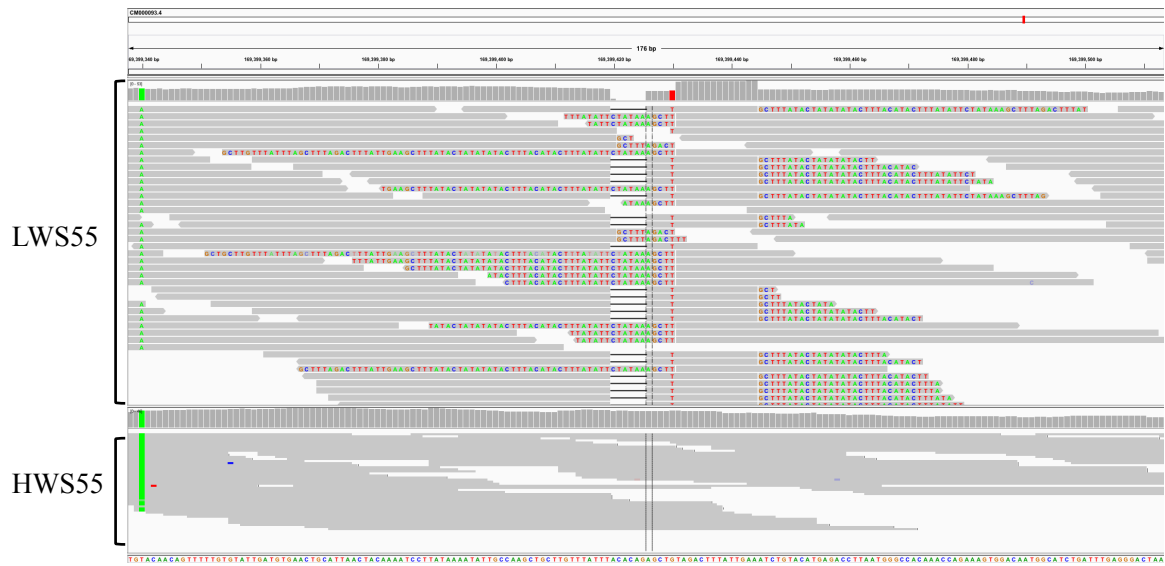

Figure S4. IGV display of chromosome 1: 169,399,340-169,399,510 in generation 55 showing location of indel (chr1: 169,399,420) showing fixation in LWS and absence in HWS, with soft clipped reads shown.
